# Supplementary material
Source: PubMed Central journal article supplement (PMC4275406)
Supplement: NIHMS600197-supplement-supplement_1.pdf [file NIHMS600197-supplement-supplement_1.pdf]

**Table 1. Descriptive Statistics on Parent-Offspring Relationship Problems in Adolescence and Adulthood: Raw Variables**

|                            | <i>M</i> | <i>SD</i> | <i>Min</i> | <i>Max</i> |
|----------------------------|----------|-----------|------------|------------|
| <b>Age 18</b>              |          |           |            |            |
| Conflict                   | 22.41    | 6.30      | 12         | 48         |
| Involvement                | 37.28    | 6.14      | 15         | 48         |
| Parent regard<br>for child | 18.27    | 2.17      | 5          | 20         |
| Child regard<br>for parent | 27.94    | 3.51      | 8          | 32         |
| <b>Age 25</b>              |          |           |            |            |
| Mean of 6<br>Items         | 3.23     | .55       | 1          | 4          |

*NOTE:* *M* = Mean, *SD* = Standard Deviation, *Min* = Minimum, *Max* = Maximum. While recoded into the same direction for all subsequent analyses, here conflict was coded such that a higher scored indicated more conflict, while for the involvement and regard scales, a higher scored indicated more involvement and regard. For the age 25 scale, a higher scored indicated more positive relationship quality prior to the recode. For all subsequent analyses, these scales/items were recoded so that a higher scored indicated a greater degree of parent-child relationship problems.

**Table 2. Descriptive Statistics on EXT in Adolescence and Adulthood: Raw Variables**

|                                  | <i>M</i> | <i>SD</i> | <i>Min</i> | <i>Max</i> | <i>% meeting<br/>Definite<br/>DSM IIR<br/>Diagnosis*</i> | <i>% meeting<br/>with 1<br/>Clinical<br/>Symptom</i> |
|----------------------------------|----------|-----------|------------|------------|----------------------------------------------------------|------------------------------------------------------|
| <b>Age 18</b>                    |          |           |            |            |                                                          |                                                      |
| Adult Antisocial Behavior        | .66      | 1.18      | 0          | 7          | 4.5                                                      | 34.4                                                 |
| Nicotine Dependence              | .74      | 1.57      | 0          | 7          | 15.1                                                     | 22.9                                                 |
| Alcohol Dependence               | .51      | 1.27      | 0          | 9          | 7.8                                                      | 20.8                                                 |
| Illicit Drug<br>Abuse/Dependence | .35      | 1.18      | 0          | 9          | 5.2                                                      | 11.8                                                 |
| <b>Age 25</b>                    |          |           |            |            |                                                          |                                                      |
| Adult Antisocial Behavior        | 1.10     | 1.18      | 0          | 8          | 4.8                                                      | 66.5                                                 |
| Nicotine Dependence              | 1.11     | 1.74      | 0          | 7          | 22.2                                                     | 35.6                                                 |
| Alcohol Dependence               | .93      | 1.55      | 0          | 9          | 14.2                                                     | 39.0                                                 |
| Illicit Drug<br>Abuse/Dependence | .47      | 1.39      | 0          | 9          | 6.8                                                      | 16.3                                                 |

*NOTE: M* = Mean, *SD* = Standard Deviation, *Min* = Minimum, *Max* = Maximum, *EXT* = Externalizing Disorders. \* a total of 4 symptoms were necessary to meet diagnosis for Adult Antisocial Behavior, 3 symptoms were necessary to meet nicotine, alcohol dependence, or illicit drug abuse/dependence.

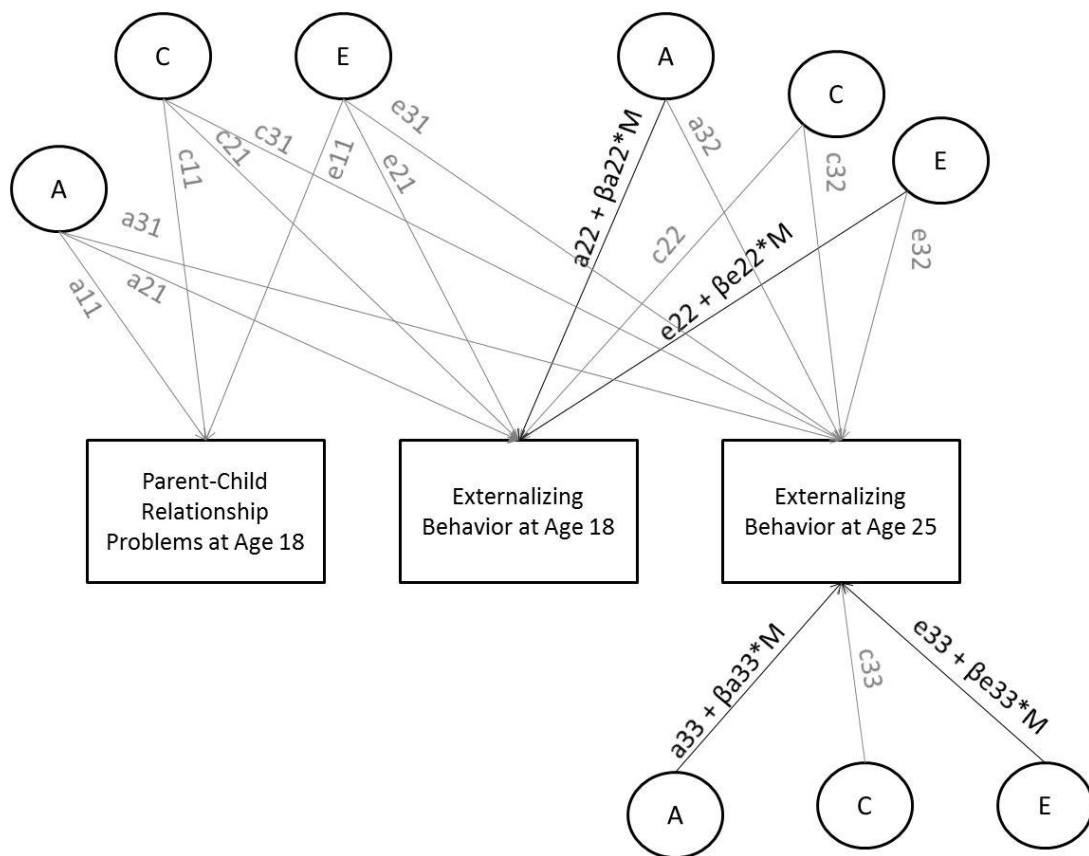

**Figure 1. Trivariate Model of Gene-Environment Interplay.** A refers to genetic influences, C refers to shared environmental influences, and E refers to nonshared environmental influences. Parameters  $a_{11}$ ,  $c_{11}$ ,  $e_{11}$  refer to the genetic and environmental influences on parent-child relationship problems at age 18. Parameters  $a_{21}$ ,  $c_{21}$ ,  $e_{21}$  refer to the genetic and environmental influences on parent-child relationship problems at age 18 in common with EXT at age 18. Parameters  $a_{22}$ ,  $c_{22}$ ,  $e_{22}$  refer to the unique genetic and environmental influences on EXT at age 18. Paths  $a_{31}$ ,  $a_{32}$ ,  $e_{32}$  refer to the genetic and environmental influences on parent-child relationship problems at age 18 in common with EXT at age 25 (above and beyond the common influences on parent-child relationship problems at age 18 and EXT at age 18). Paths  $a_{33}$ ,  $c_{33}$ ,  $e_{33}$  refer to the unique genetic and environmental influences on EXT at age 25.  $\beta$  describes the magnitude and direction of moderation effect, M indicates the level of the moderator. For clarity

of presentation, all paths with a tested moderator are denoted in black, all non-moderated paths are in gray. Moderated paths were tested based on the results of the cross-sectional, bivariate GxE tests at ages 18 and 25.

!GxE and rGE, testing unique AE moderation on EXT18 and EXT25

!variables entered as RQ18 -> EXT18 -> EXT25

!based on Purcell's (2002) GxE in context of rGE

Group1: Defines Matrices

Data Calc NGroups=3

Begin Matrices;

! GENETIC EFFECTS

A full 1 1 free ! cholesky elements for A, a11

B full 1 1 free ! a22

C full 1 1 free !a33

D full 1 1 free ! a21

E full 1 1 free !a31

F full 1 1 free !a32

G full 1 1 free ! moderation on unique path a22

H full 1 1 free ! moderation on unique path a33

! NONSHARED E

I full 1 1 free ! cholesky elements for E, e11

J full 1 1 free ! e22

K full 1 1 free !e33

L full 1 1 free ! e21

M full 1 1 free !e31

N full 1 1 free !e32

O full 1 1 free ! moderation on unique path e22

P full 1 1 free ! moderation on unique path e33

! SHARED E

Q full 1 1 free ! cholesky elements for C, c11

R full 1 1 free !c22

S full 1 1 free !c33

T full 1 1 free !c21

U full 1 1 free !c31

V full 1 1 free !c32

W full 1 3 free ! means (M, T)

X full 1 1 ! constant, 1/2

Y full 1 1 ! twin 1 moderator (definition variable)

Z full 1 1 ! twin 2 moderator (definition variable)

End Matrices;

Matrix X .5

Ma A 0.43 !a11 !BASED ON TRIVARIATE CHOLESKY

Ma B 0.67 !a22

Ma C 0.59 !a33

Ma D 0.16 !a21

Ma E 0.14 !a31

Ma F 0.46 !a32

Ma G 0.0

Ma H 0.0

Ma I 0.42 !e11

Ma J 0.28 !e22

Ma K 0.29 !e33

Ma L 0.04 !e21

Ma M 0.05 !e31

Ma N 0.07 !e21

Ma O 0.0

Ma P 0.0

Ma Q 0.16 !c11  
Ma R 0.07 !c22  
Ma S 0.04 !c33  
Ma T 0.06 !c21  
Ma U 0.05 !c31  
Ma V 0.06 !c32  
End

Group2: MZ  
DATA NI=14  
MISSING=-99  
RE FILE=E:\MASTER DYAD nov 12.dat  
LABEL ZYGOSITY IDFAMSEX  
parchild\_age17\_TWA  
EXT\_age17log\_TWA  
parchild\_age24\_TWA  
EXT\_age24log\_TWA  
parchild\_age17\_TWB  
EXT\_age17log\_TWB  
parchild\_age24\_TWB  
EXT\_age24log\_TWB  
Rparchild\_age17\_TWA Rparchild\_age17\_TWB  
Rparchild\_age24\_TWA Rparchild\_age24\_TWB

Select if ZYGOSITY = 1 /

Select  
parchild\_age17\_TWA  
EXT\_age17log\_TWA

EXT\_age24log\_TWA  
 parchild\_age17\_TWB  
 EXT\_age17log\_TWB  
 EXT\_age24log\_TWB  
 Rparchild\_age17\_TWA  
 Rparchild\_age17\_TWB /

Definition Rparchild\_age17\_TWA Rparchild\_age17\_TWB/

Matrices= Group 1

Means W | W /

|    |      |     |     |      |                         |     |   |     |     |                                    |
|----|------|-----|-----|------|-------------------------|-----|---|-----|-----|------------------------------------|
| CO | (A*A | A*D | A*E | _A*D | (B+G*Y)*(B+G*Y) + (D*D) | B*F | _ | A*E | B*F | (C+H*Y)*(C+H*Y) + (F*F) + (E*E)) + |
|    | (Q*Q | Q*T | Q*U | _Q*T | (R*R) + (T*T)           | V*R | _ | Q*U | V*R | (S*S) + (V*V) + (U*U)) +           |
|    | (I*I | I*L | I*M | _I*L | (J+O*Y)*(J+O*Y) + (L*L) | N*J | _ | I*M | N*J | (K+P*Y)*(K+P*Y) + (N*N) + (M*M))   |
|    |      |     |     |      |                         |     |   |     |     |                                    |
|    | (A*A | A*D | A*E | _A*D | (B+G*Y)*(B+G*Z) + (D*D) | B*F | _ | A*E | B*F | (C+H*Y)*(C+H*Z) + (F*F) + (E*E)) + |
|    | (Q*Q | Q*T | Q*U | _Q*T | (R*R) + (T*T)           | V*R | _ | Q*U | V*R | (S*S) + (V*V) + (U*U))             |
|    | -    |     |     |      |                         |     |   |     |     |                                    |
|    | (A*A | A*D | A*E | _A*D | (B+G*Y)*(B+G*Z) + (D*D) | B*F | _ | A*E | B*F | (C+H*Y)*(C+H*Z) + (F*F) + (E*E)) + |
|    | (Q*Q | Q*T | Q*U | _Q*T | (R*R) + (T*T)           | V*R | _ | Q*U | V*R | (S*S) + (V*V) + (U*U))             |
|    |      |     |     |      |                         |     |   |     |     |                                    |
|    | (A*A | A*D | A*E | _A*D | (B+G*Y)*(B+G*Z) + (D*D) | B*F | _ | A*E | B*F | (C+H*Y)*(C+H*Z) + (F*F) + (E*E)) + |
|    | (Q*Q | Q*T | Q*U | _Q*T | (R*R) + (T*T)           | V*R | _ | Q*U | V*R | (S*S) + (V*V) + (U*U)) +           |
|    | (I*I | I*L | I*M | _I*L | (J+O*Z)*(J+O*Z) + (L*L) | N*J | _ | I*M | N*J | (K+P*Z)*(K+P*Z) + (N*N) + (M*M))   |

/  
 Specify Y -1  
 Specify Z -2  
 Options NO\_Output  
 Options RS  
 End



Group3: DZ  
DATA NI=14  
MISSING=-99  
RE FILE=E:\MASTER DYAD nov 12.dat  
LABEL ZYGOSITY IDFAMSEX  
parchild\_age17\_TWA  
EXT\_age17log\_TWA  
parchild\_age24\_TWA  
EXT\_age24log\_TWA  
parchild\_age17\_TWB  
EXT\_age17log\_TWB  
parchild\_age24\_TWB  
EXT\_age24log\_TWB  
Rparchild\_age17\_TWA Rparchild\_age17\_TWB  
Rparchild\_age24\_TWA Rparchild\_age24\_TWB

Select if ZYGOSITY = 1 /

Select  
parchild\_age17\_TWA  
EXT\_age17log\_TWA  
EXT\_age24log\_TWA  
parchild\_age17\_TWB  
EXT\_age17log\_TWB  
EXT\_age24log\_TWB  
Rparchild\_age17\_TWA  
Rparchild\_age17\_TWB /

Definition Rparchild\_age17\_TWA Rparchild\_age17\_TWB/

Matrices= Group 1

Means W | W /

```
CO (A*A | A*D | A*E _A*D | (B+G*Y)*(B+G*Y) + (D*D) | B*F _ A*E | B*F | (C+H*Y)*(C+H*Y) + (F*F) + (E*E)) +
(Q*Q | Q*T | Q*U _Q*T | (R*R) + (T*T) | V*R _ Q*U | V*R | (S*S) + (V*V) + (U*U)) +
(I*I | I*L | I*M _I*L | (J+O*Y)*(J+O*Y) + (L*L) | N*J _ I*M | N*J | (K+P*Y)*(K+P*Y) + (N*N) + (M*M))
|
X@(A*A| A*D | A*E _A*D | (B+G*Y)*(B+G*Z) + (D*D) | B*F _ A*E | B*F | (C+H*Y)*(C+H*Z) + (F*F) + (E*E)) +
(Q*Q | Q*T | Q*U _Q*T | (R*R) + (T*T) | V*R _ Q*U | V*R | (S*S) + (V*V) + (U*U))
-
X@(A*A| A*D | A*E _A*D | (B+G*Y)*(B+G*Z) + (D*D) | B*F _ A*E | B*F | (C+H*Y)*(C+H*Z) + (F*F) + (E*E)) +
(Q*Q | Q*T | Q*U _Q*T | (R*R) + (T*T) | V*R _ Q*U | V*R | (S*S) + (V*V) + (U*U))
|
(A*A | A*D | A*E _A*D | (B+G*Y)*(B+G*Z) + (D*D) | B*F _ A*E | B*F | (C+H*Y)*(C+H*Z) + (F*F) + (E*E)) +
(Q*Q | Q*T | Q*U _Q*T | (R*R) + (T*T) | V*R _ Q*U | V*R | (S*S) + (V*V) + (U*U)) +
(I*I | I*L | I*M _I*L | (J+O*Z)*(J+O*Z) + (L*L) | N*J _ I*M | N*J | (K+P*Z)*(K+P*Z) + (N*N) + (M*M))
```

/

Specify Y -1

Specify Z -2

Options NO\_Output

Options RS

End
